# Supplementary material for: Thymoquinone enhances cisplatin-response through direct tumor effects in a syngeneic mouse model of ovarian cancer
Source: Springer Nature journal article supplement (doi:10.1186/s13048-015-0177-8), 2015-07-27
Supplement: MOESM1 [file 9778632]

**Figure S1**

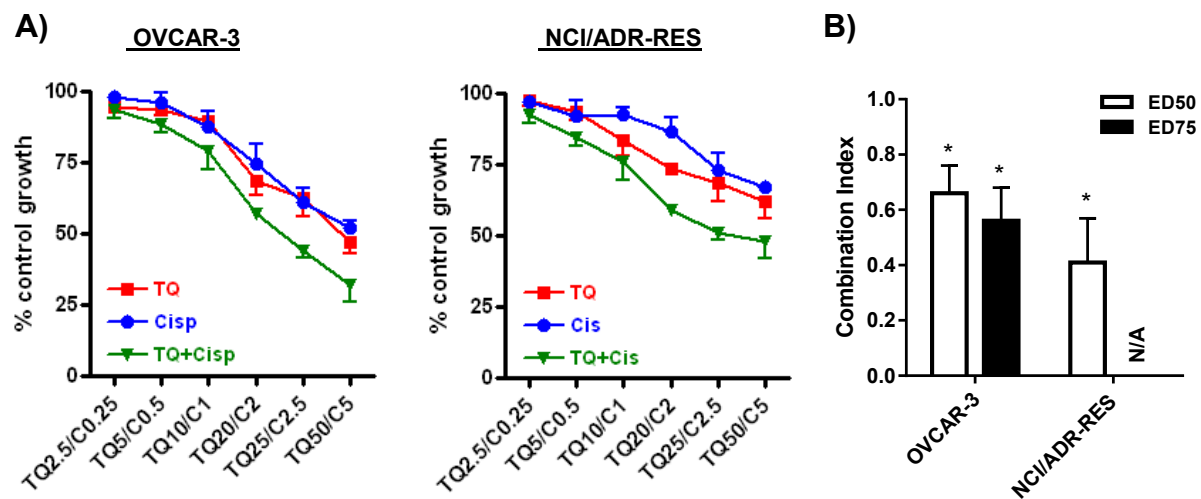

**A)** SRB assays showing drug effects of TQ and/or cisplatin (concentrations in  $\mu\text{M}$ , 72 hours) in 2 human ovarian cancer cell lines (NCI/ADR-RES and OVCAR-3). **B)** Isobologram analysis Combination Index for, where applicable, Effective Doses (ED) ED50, ED75 and ED90. A combination  $< 1$  indicates a synergistic drug interaction between TQ and cisplatin. Values are mean  $\pm$  SE for 3 experiments; \*  $p < 0.01$ , Student's t test. N/A; not applicable.
